# Supplementary material for: A nitrogen-doped carbon fiber coating embedded in the separator for stable zinc batteries
Source: Royal Society of Chemistry journal article supplement (doi:10.1039/d4cc01959h), 2024-01-01
Supplement: d4cc01959h1.pdf [file d4cc01959h1.pdf]

1

## Supplementary Information

### 2 Nitrogen doped carbon fibers coating embedded in the separator 3 for stable zinc batteries

4 Dingzhong Luo,<sup>a</sup> Jiae Wu,<sup>a</sup> Wentao Deng,<sup>a</sup> Guoqiang Zou,<sup>a</sup> Hongshuai Hou,<sup>\*a</sup>  
5 Xiaobo Ji,<sup>a</sup>

6 <sup>a</sup>National Energy Metal Resources and New Materials Key Laboratory, College of  
7 Chemistry and Chemical Engineering, Central South University, Changsha, 410083,  
8 China

9 Corresponding Author Email address: hs-hou@csu.edu.cn

10

#### 11 1. Experimental Section

##### 12 1.1. Material Synthesis

###### 13 1.1.1 Synthesis of CDs and Carbon Fibers

14 The synthesis of CDs and carbon fibers was based on our previous reports.<sup>1</sup>  
15 NaOH (12 g) was gradually added into acetaldehyde solution (40 mL, 40% aqueous  
16 solution) under violent stirring, and the resulting mixture was continuously stirred for  
17 2 hours. And then, the product was sonicated with diluted hydrochloric acid and water  
18 until flocculation occurred. Subsequently, the product underwent washing with  
19 deionized water until neutralization was achieved. The resulting CDs were then dried  
20 in a drying oven at 70 °C. For the synthesis of carbon fibers, a homogeneous mixture  
21 of carbon dots (0.4 g) and zinc chloride (2.4 g) was subjected to heating at 400 °C for  
22 4 hours in an argon atmosphere, with a heating rate of 10 °C min<sup>-1</sup>. The resulting  
23 calcined product (CF400) underwent washing with diluted hydrochloric acid and  
24 distilled water. The dried CF400 was then mixed with carbamide, followed by heating  
25 to 700 °C at a temperature rising rate of 3 °C min<sup>-1</sup> under argon, and maintained for 2  
26 hours. The washing and drying procedures for nitrogen-doped carbon fibers (NCF700)  
27 were identical to those for CF400. The synthesis of pure carbon fibers (CF700)  
28 followed the same process as NCF700, except for the absence of carbamide.

###### 29 1.1.2 Preparation of modified separator

30 The coated separator was fabricated by blending carbon fibers (CF700 or  
31 NCF700) and carboxymethyl cellulose (CMC) at a mass ratio of 8:2 in an appropriate  
32 quantity of deionized (DI) solvent. Following magnetic stirring for 12 hours at room  
33 temperature, the resulting homogeneous slurry was applied onto a glass fiber  
34 separator using the doctor blading technique. Subsequently, the coated separator was  
35 subjected to vacuum drying at 60 °C for 12 hours to eliminate excess water solvent,  
36 yielding the products termed CF700@GF or NCF700@GF. After obtaining the dried  
37 composite separator, it is cut into circular pieces of uniform diameter. Subsequently,  
38 these separator pieces, laden with identical loads of carbon fiber, are assembled  
39 together in a coated juxtaposition manner to form the composite separator. This  
40 resultant structure is designated as GF@CF700@GF and GF@NCF700@GF. Two  
41 pieces of separator with the same size were assembled with their coated sides facing

42 the electrode and designated as GF@GF@NCF700. The blank control group employs  
43 two uncoated separator pieces for identical assembly procedures, designated as  
44 GF@GF. In all electrochemical tests conducted in this paper, bilayer assembled  
45 separators were utilized.

#### 46 1.1.3 Preparation of Mg-Doped $\text{NH}_4\text{V}_4\text{O}_{10}$ (MNVO) cathode materials

47 The MNVO was synthesized using a modified hydrothermal method as described  
48 in previous literature.<sup>2</sup>  $\text{NH}_4\text{V}_4\text{O}_{10}$  was synthesized through a single-step hydrothermal  
49 method, wherein 0.64 g  $\text{NH}_4\text{VO}_3$  was dissolved in 80 ml of deionized (DI) water at 60  
50 °C with stirring. Subsequently, 1.16 g  $\text{H}_2\text{C}_2\text{O}_4 \cdot 2\text{H}_2\text{O}$  was added to the solution until it  
51 attained a dark green color. Upon complete dissolution, magnesium oxalate was  
52 introduced into the dark green solution at a predetermined ratio (Mg:V = 1:16). The  
53 resulting mixture was transferred to a 100 ml Teflon-lined autoclave and maintained  
54 at 180 °C for 3 hours. The resulting dark green powder was obtained by successive  
55 rinsing with distilled water/alcohol and subsequent vacuum drying at 60 °C for 24  
56 hours. The MNVO cathodes were prepared by blending 60 wt% of active materials,  
57 20 wt% of polyvinylidene fluoride (PVDF) binder, and 20 wt% of conductive carbon  
58 (Super P) in N-methyl pyrrolidinone (NMP). These slurries were then coated onto  
59 stainless-steel mesh substrates containing the active materials. Finally, the prepared  
60 electrodes were obtained for further use after vacuum drying at 100 °C for 10 hours.

61

## 62 2. Materials Characterizations

63 X-ray diffraction (XRD) data were acquired using a Rigaku Ultima IV X-ray  
64 diffractometer operating at a scan rate of  $10^\circ\text{min}^{-1}$ . High-resolution transmission  
65 electron microscopy (HRTEM), elemental mapping, and selected-area electron  
66 diffraction (SAED) patterns were obtained using a JEOL JEM 2100F transmission  
67 electron microscope (TEM). The scanning electron microscope (SEM) images of the  
68 separators and carbon fibers were captured using a JEOL JSM-7610F Plus and a  
69 TESCAN MIRA4. Optical images of the electrodes were acquired using a Digital  
70 Microscope KH-7700. Contact angle measurements between the  
71 GF@GF/GF@NCF700@GF and the 2 M  $\text{ZnSO}_4$  electrolyte were performed using a  
72 Contact Angle Goniometer (SDC-100 China, Dongguan). Electron probe  
73 microanalysis (EPMA) was conducted using a JXA152 8530F-PLUS instrument.

74

## 75 3. Electrochemical measurements

76 All experiments were conducted using CR2016 coin cells, employing GF@  
77 GF/GF@CF700@GF/GF@NCF700@GF separators and a 2 M  $\text{ZnSO}_4$  electrolyte.  
78 Electrodes were shaped into circular disks with a diameter of 12 mm. Symmetric cells  
79 were constructed using two identical disks, resulting in both the anode and cathode  
80 being identical. Half cells were assembled using two different disks, with the anode  
81 being a bare Zn anode and the cathode a bare Cu electrode. Assembly of  
82  $\text{Zn}||\text{GF@GF/GF@NCF700@GF}||\text{MNVO}$  full cells followed a similar procedure to  
83  $\text{Zn}||\text{GF@GF/GF@NCF700@GF}||\text{Zn}$  symmetric cells, except one Zn electrode was  
84 replaced with an MNVO cathode.

85 Electrochemical characterization, including electrochemical impedance  
86 spectroscopy (EIS), cyclic voltammetry (CV), Tafel curves, and Chronoamperometry  
87 (CA), was performed using a CHI660E electrochemical workstation. CV analysis of  
88 half cells was conducted at a scan rate of 1 mV s<sup>-1</sup>, while CV analysis of full cells was  
89 conducted at a scan rate of 0.2 mV s<sup>-1</sup>. Contact angle (CA) measurements were  
90 conducted in Zn||GF@GF/GF@NCF700@GF||Zn symmetric cells at an overpotential  
91 of -150 mV. The electrochemical performance of Zn||GF@GF||MNVO and  
92 Zn||GF@NCF700@GF||MNVO full cells was assessed using a Neware BTS4000 test  
93 system within a voltage window of 0.2 to 1.5 V.

94

95

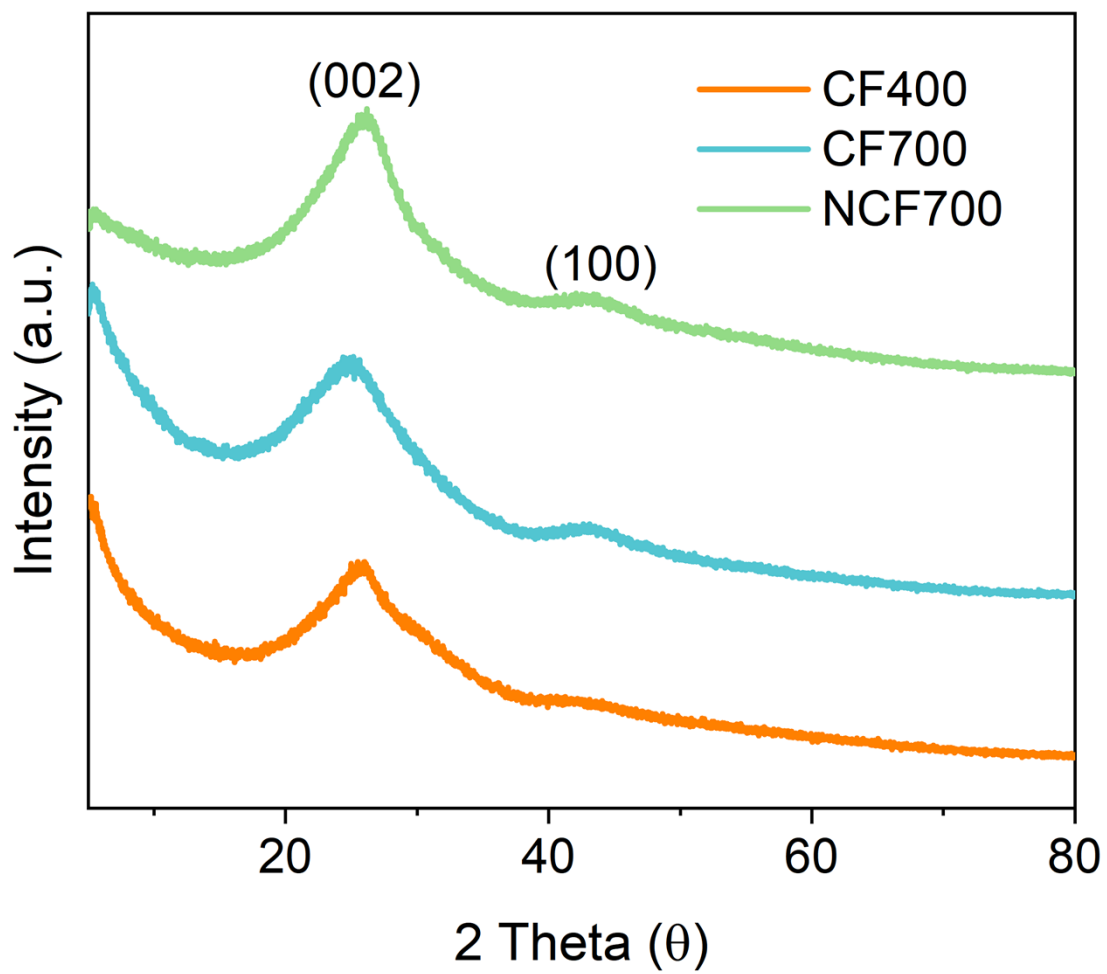

96

97 Fig. S1 XRD patterns of CF400, CF700 and NCF700.

98

99

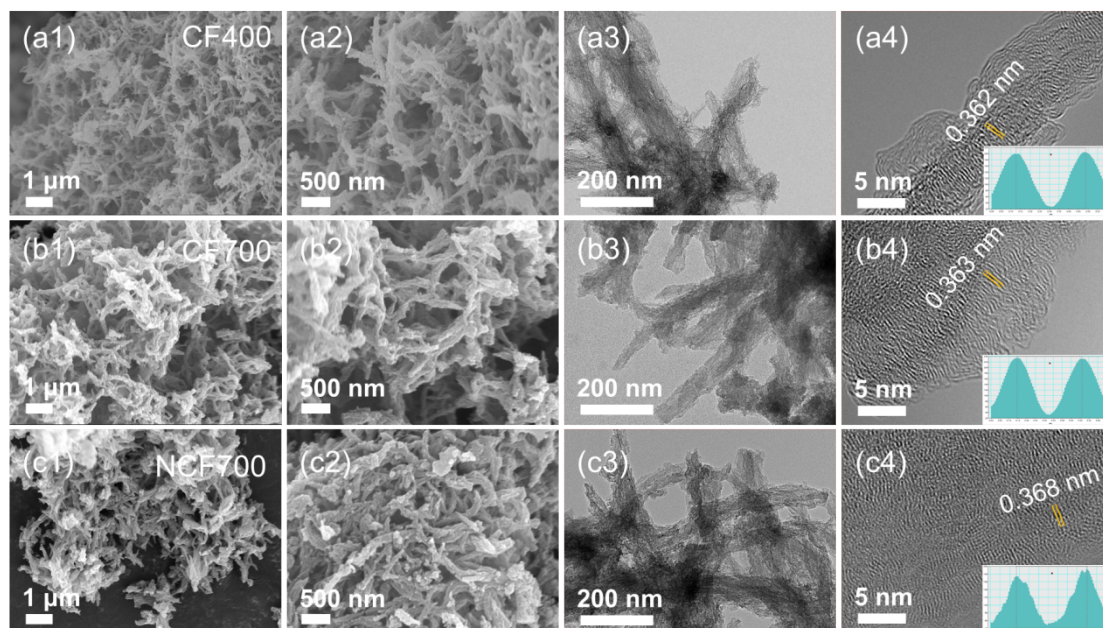

100

101 Fig. S2 SEM, TEM, and HRTEM of (a) CF400, (b) CF700, and (c) NCF700.

102

103

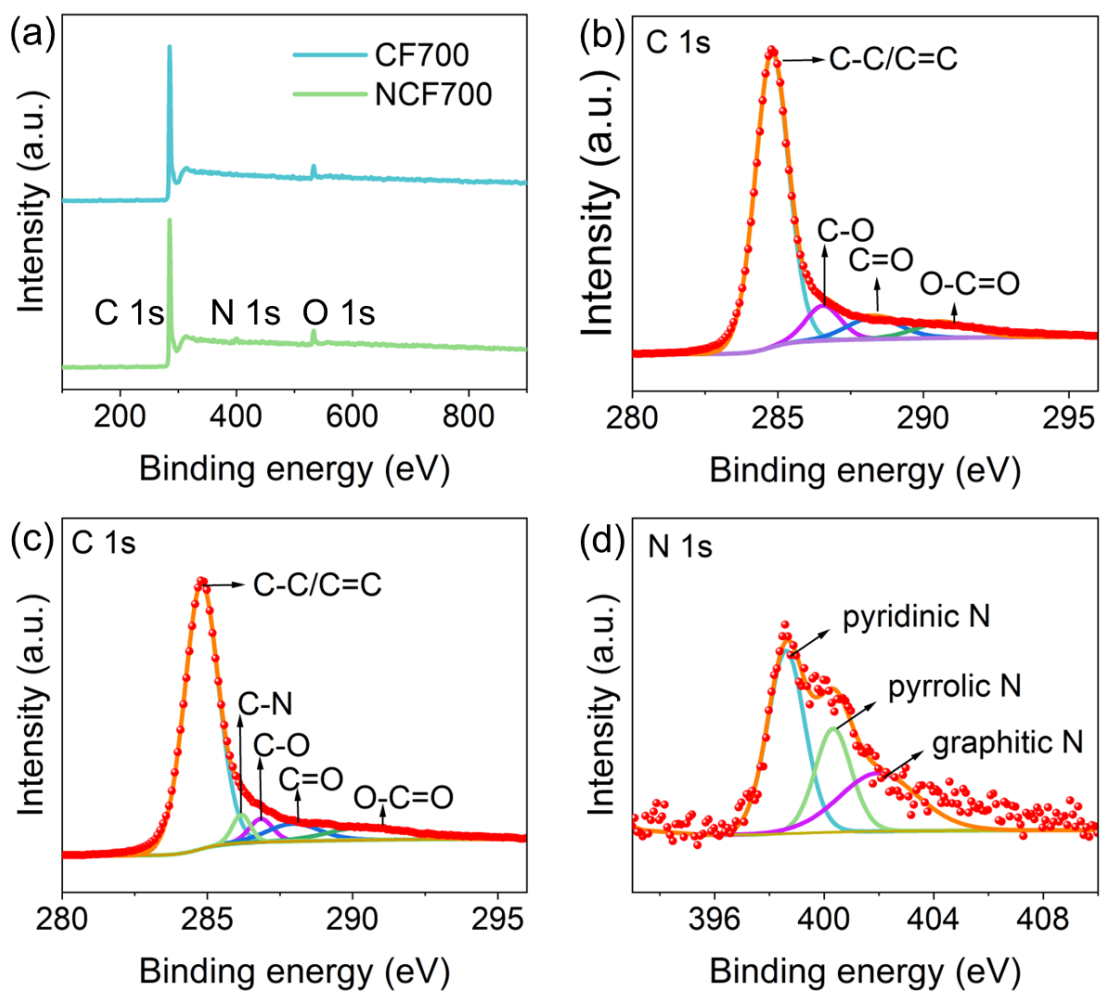

104

105 Fig. S3 (a) XPS survey spectra, The C 1s spectra of (b) CF700 and (c) NCF700, (d)

106 high-resolution N 1s of NCF700.

107

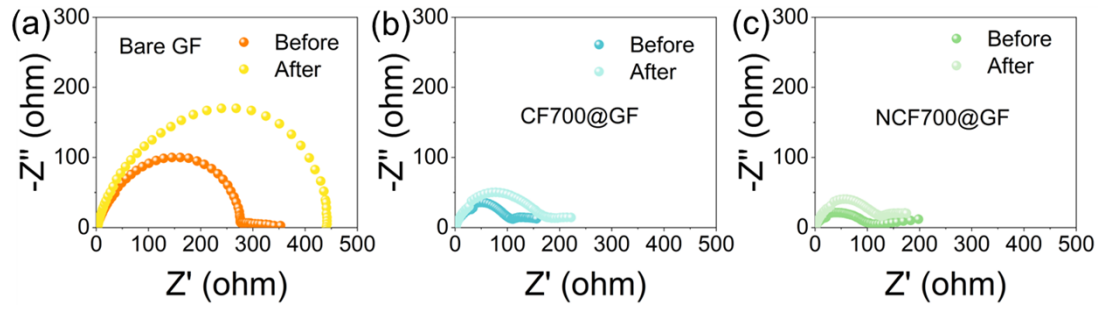

108

109 Fig. S4 Nyquist plots of symmetric cells with (a) bare GF, (b) CF700@GF and (c)  
 110 NCF700@GF separators before and after CA measurement.

111

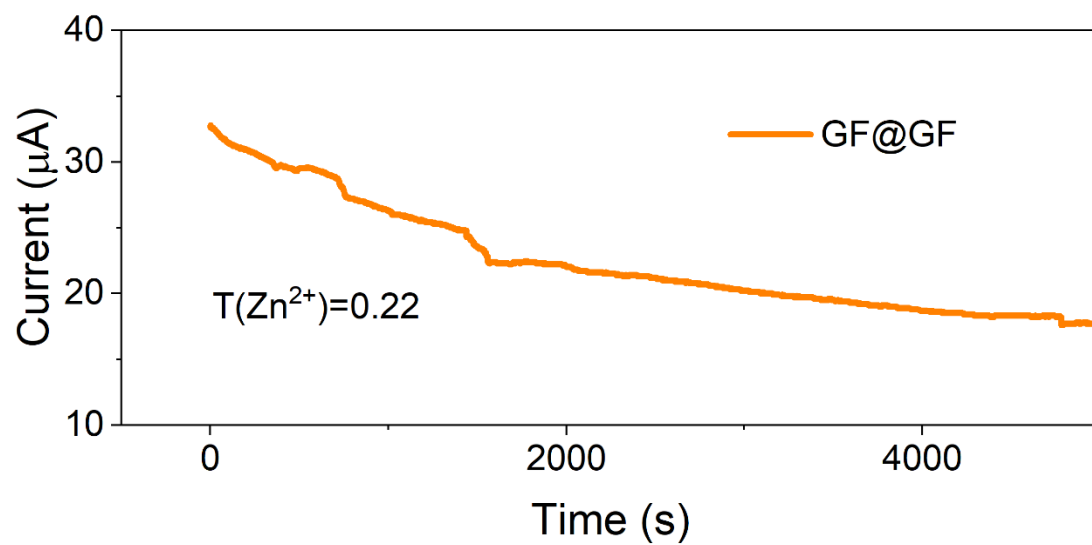

112

113 Fig. S5 Chronoamperometric curve of symmetric batteries with GF@GF separator.

114



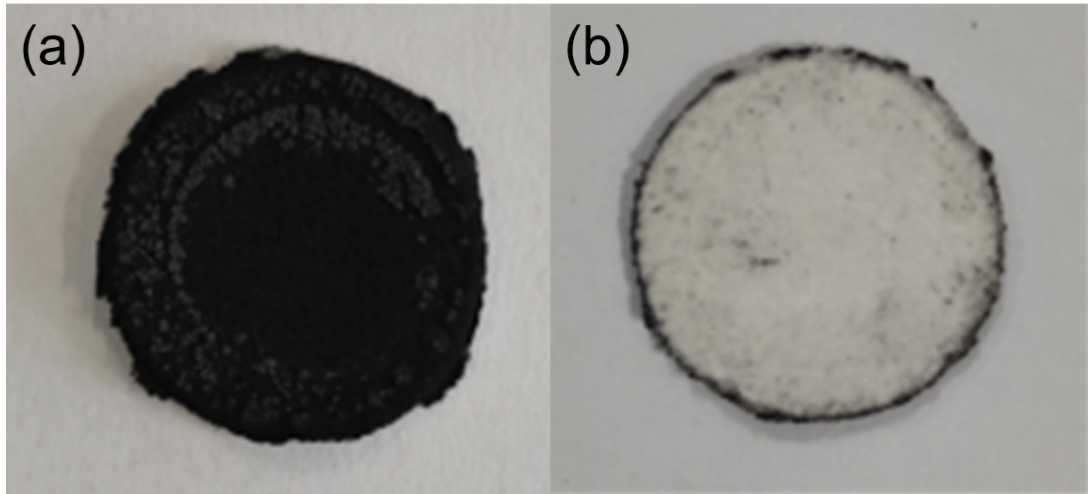

115

116 Fig. S6 digital photos of NCF700@GF FZM (a) and NCF700@GF (b) separator after  
117 20 cycles at  $4 \text{ mA cm}^{-2}$  and  $4 \text{ mAh cm}^{-2}$ .

118

119

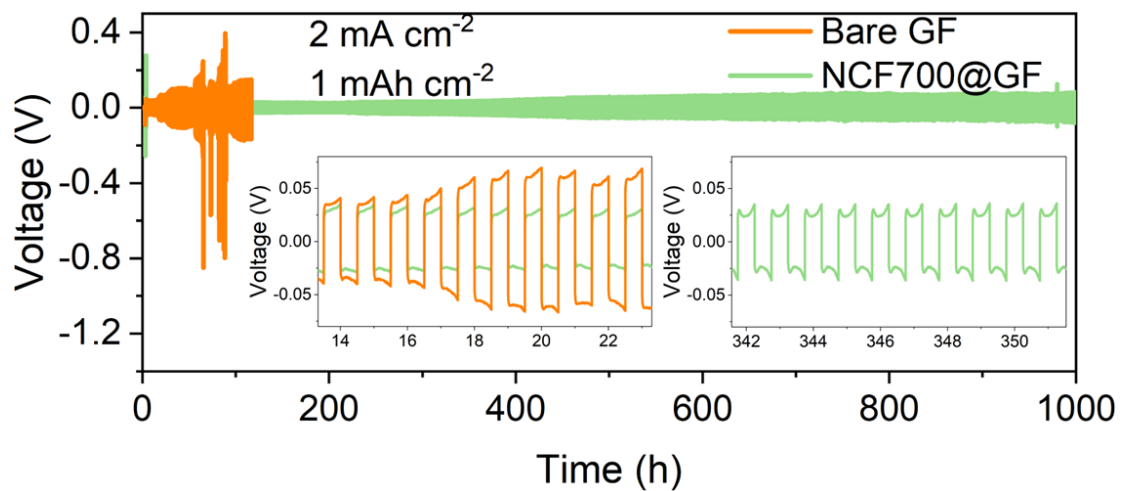

120

121 Fig. S7 Cycling performance of symmetric batteries based on bare GF and  
122 NCF700@GF at  $2 \text{ mA cm}^{-2}$ .

123

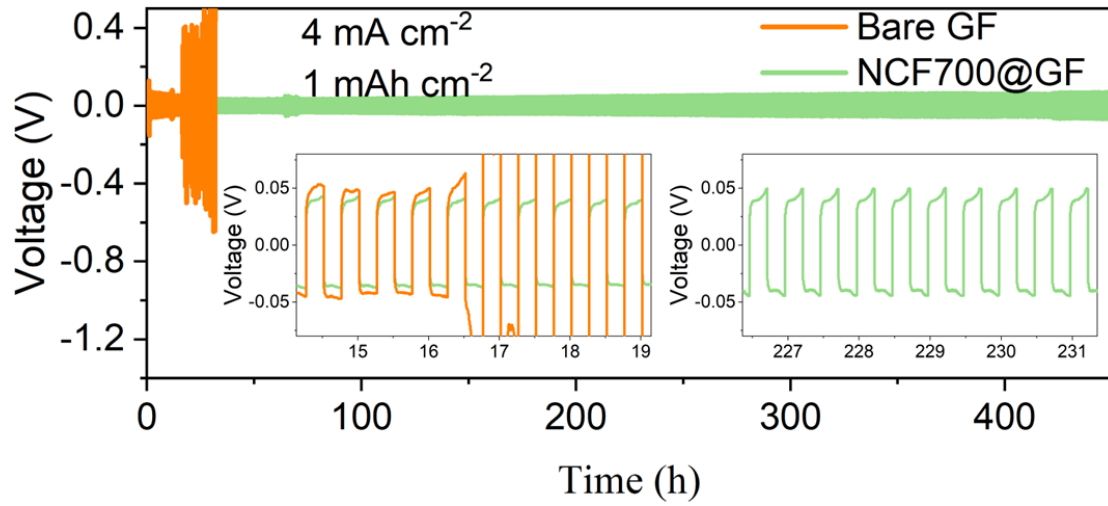

124

125 Fig. S8 Cycling performance of symmetric batteries based on bare GF and  
126 NCF700@GF at  $4 \text{ mA cm}^{-2}$ .

127

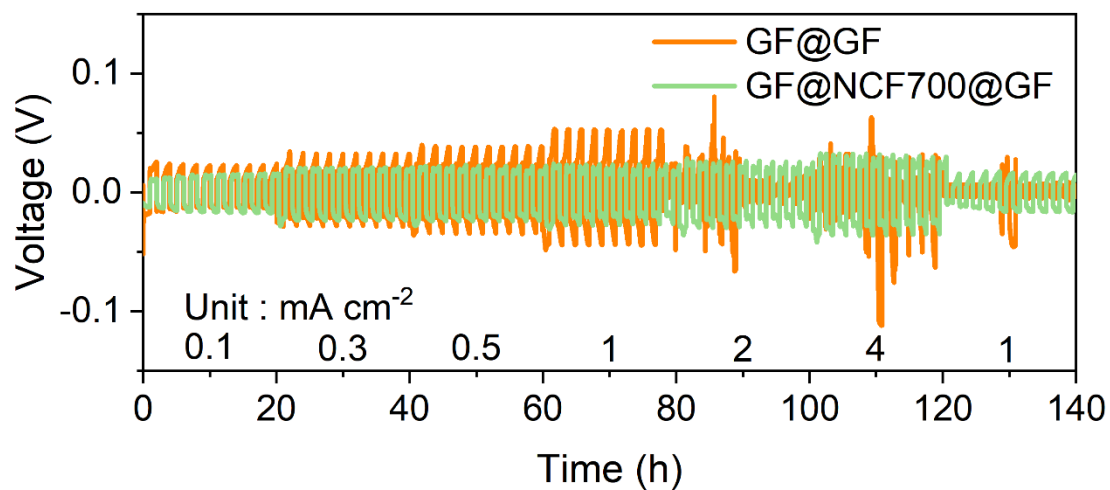

128

129 Fig. S9 The rate performance of symmetrical cells based on GF@GF and  
130 GF@NCF700@GF.

131

132

133

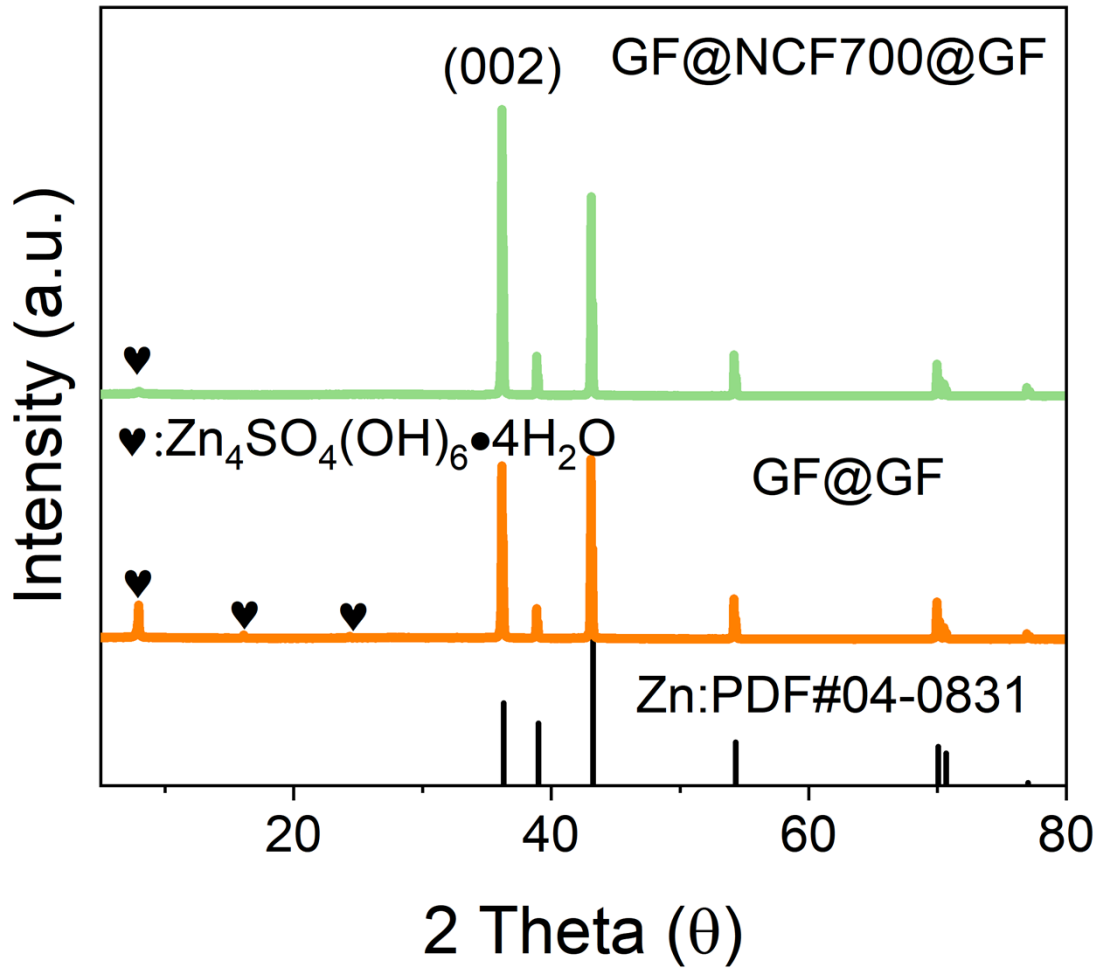

134

135 Fig. S10 XRD patterns of Zn anode based on GF@GF and GF@NCF700@GF after  
 136 20 cycles..

137

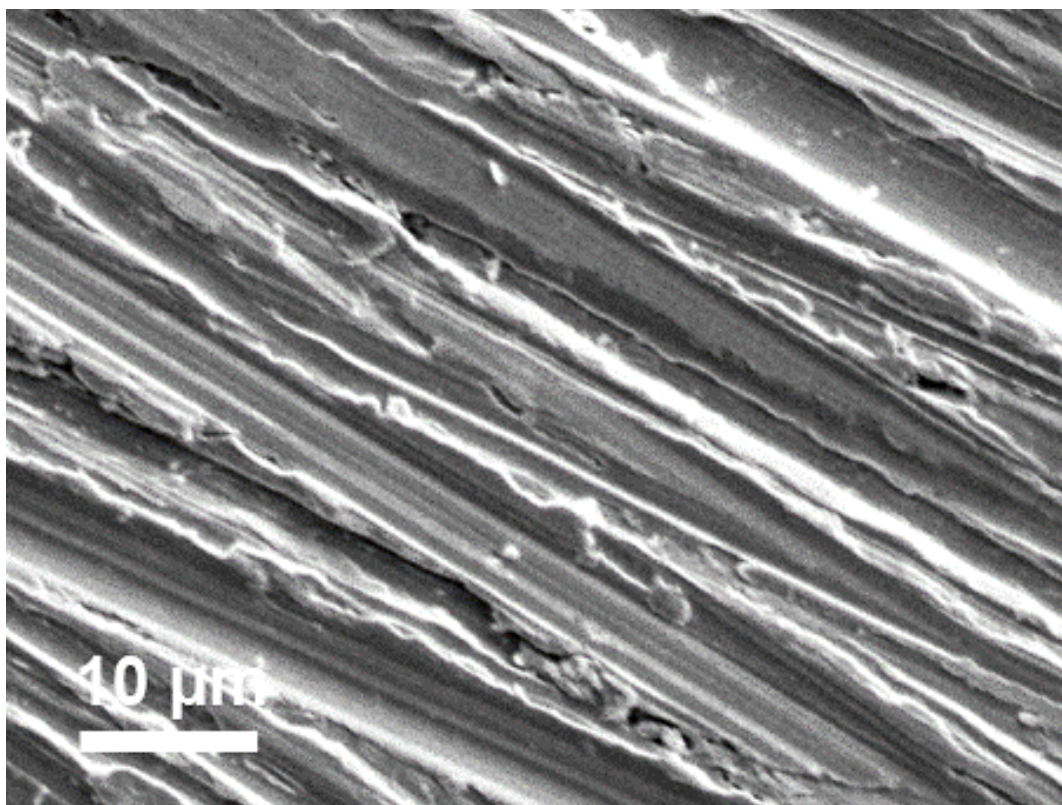

138

139 Fig. S11 SEM image of Zn foil before cycling.

140

141

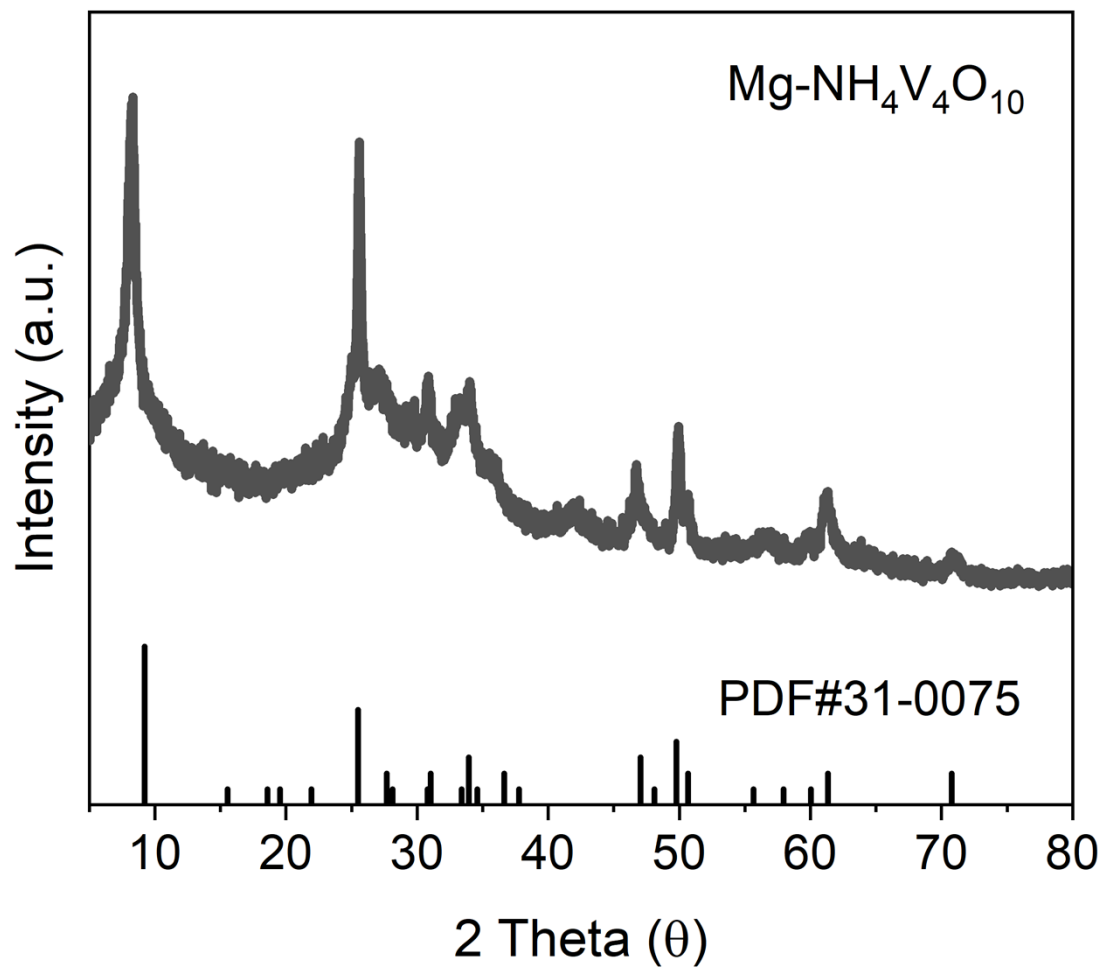

142

143 Fig. S12 XRD pattern of MNVO.

144

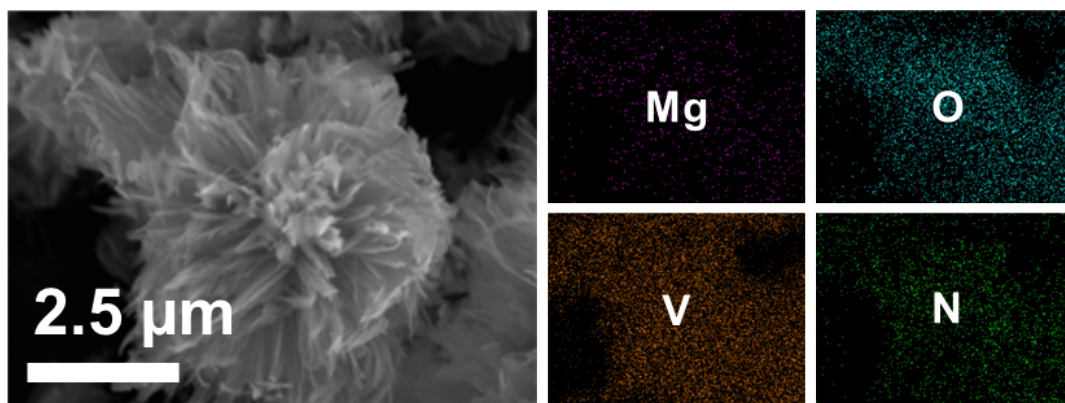

145

146 Fig. S13 SEM image and corresponding EDS mapping of MNVO.

147

148



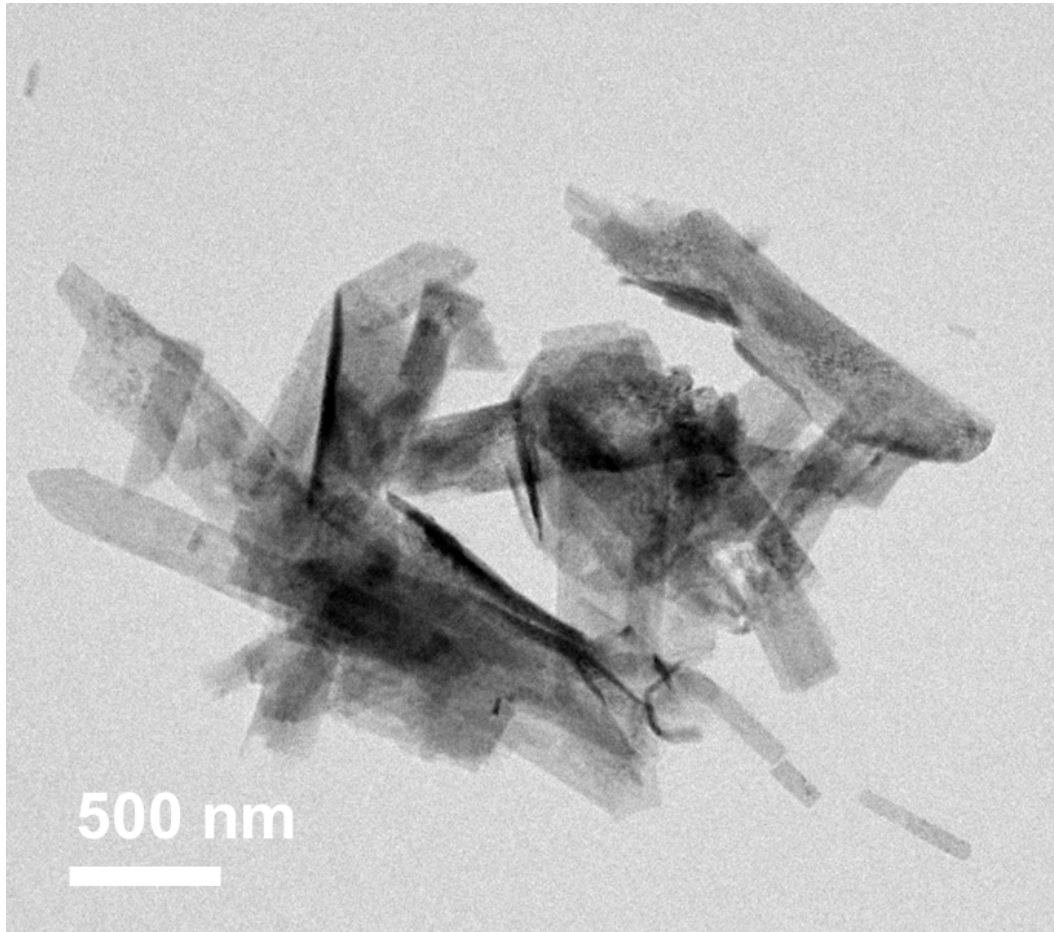

149

150 Fig. S14 TEM image of MNVO.

151

152

153

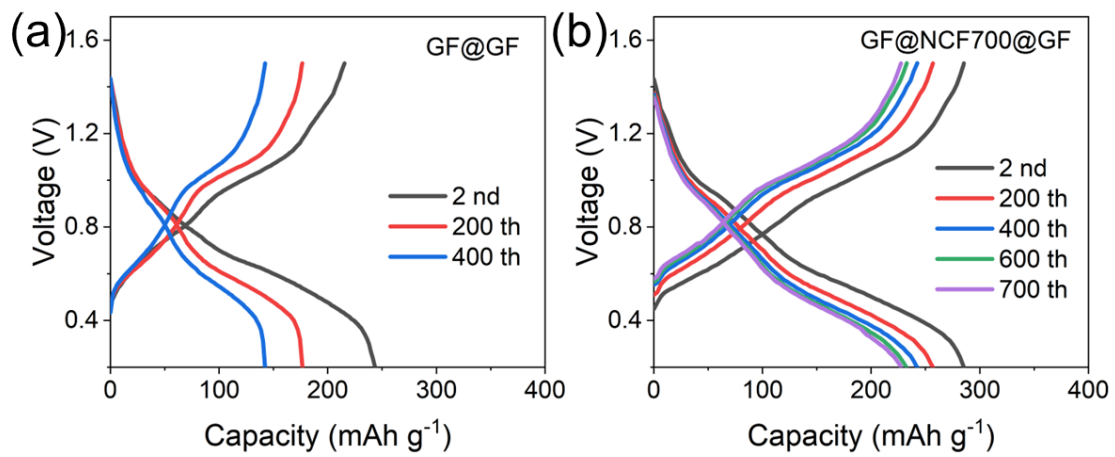

154

155 Fig. S15 Galvanostatic charge-discharge curves of (a) Zn||GF@GF||MNVO and (b)  
 156 Zn||GF@NCF700@GF||MNVO full cell at 1 A g<sup>-1</sup>.

157

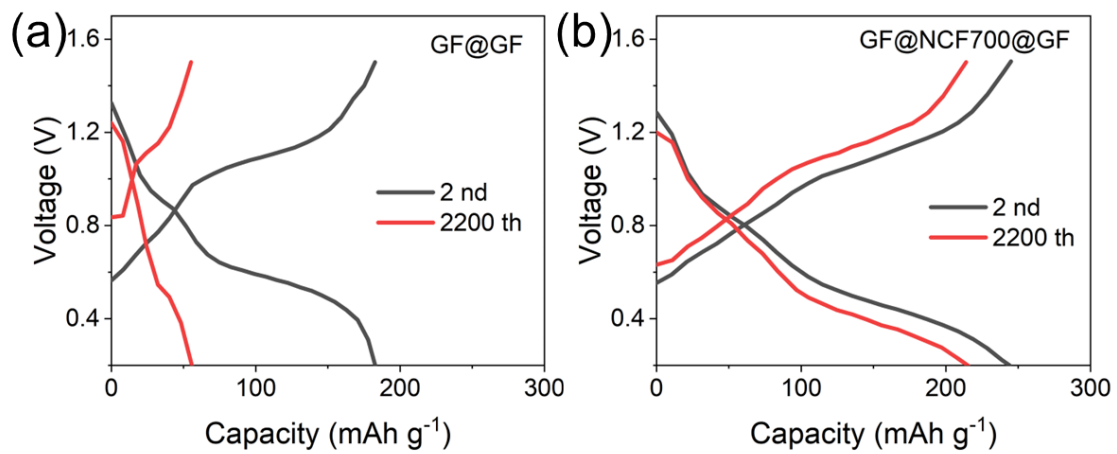

158

159 Fig. S16 Galvanostatic charge-discharge curves of (a) Zn||GF@GF||MNVO and (b)  
 160 Zn||GF@NCF700@GF||MNVO full cell at 3 A g<sup>-1</sup>.

161

162

163 References

164

165 1 L. Li, Y. Li, Y. Ye, R. Guo, A. Wang, G. Zou, H. Hou and X. Ji, *Acs Nano*, 2021,  
166 **15**, 6872-6885.

167 2 X. Wang, Y. Wang, A. Naveed, G. Li, H. Zhang, Y. Zhou, A. Dou, M. Su, Y. Liu,  
168 R. Guo and C. C. Li, *Adv. Funct. Mater.*, 2023, **33**, 2306205.

169
